# Supplementary material
Source: PubMed Central journal article supplement (PMC2966953)

## 1 **Supplementary information**

2

## 3 **Supplementary materials and methods**

4

### 5 **Mice**

6 *Pdk1*<sup>loxP/loxP</sup> mice (Hashimoto *et al.*, 2006) and *Pten*<sup>loxP/loxP</sup> mice (Reddy *et al.*, 2008) with  
7 C57BL/6J genomic background were crossed with transgenic mice carrying *Zp3*  
8 promoter-mediated Cre recombinase that also had a C57BL/6J background (de Vries *et*  
9 *al.*, 2000). After multiple rounds of crossing, we obtained homozygous mutant female  
10 mice lacking *Pdk1* in oocytes (referred to as *Pdk1*<sup>loxP/loxP</sup>;*Zp3-Cre* mice) and mice lacking  
11 both *Pdk1* and *Pten* concurrently in oocytes (referred to as *Pdk1*<sup>loxP/loxP</sup>;*Pten*<sup>loxP/loxP</sup>;*Zp3-*  
12 *Cre* mice). C57BL/6J and CD-1 male mice were used to mate with the females. The mice  
13 were housed under controlled environmental conditions with free access to water and  
14 food. Illumination was on between 0600 and 1800. All experimental protocols were  
15 approved by the regional ethics committee of Umeå University, Sweden.

16

### 17 **Western blot analysis**

18 For western blot, mouse monoclonal antibody to PDK1 (PKB kinase) and polyclonal  
19 antibody to cyclin E were purchased from Santa Cruz. Rabbit polyclonal antibodies to  
20 TSC2, Akt, phospho-Akt (S473), S6K1, phospho-S6K1 (T389), Foxo3a, phospho-  
21 Foxo3a (S253), and rabbit monoclonal antibody to phospho-TSC2 (T1462) were obtained  
22 from Cell Signaling Technologies. Rabbit polyclonal antibody to phospho-S6K1 (T229)  
23 was purchased from R&D Systems. Mouse monoclonal antibody to phospho-Akt (T308)  
24 was purchased from BD Bioscience. Mouse monoclonal antibody to  $\beta$ -actin was  
25 purchased from Sigma-Aldrich. Western blots were performed according to the  
26 instructions of the suppliers of the different antibodies and visualized using the ECL Plus  
27 Western Blotting Detection System (Amersham Biosciences).

28

### 29 ***In vitro* kinase assay**

30 Agarose bead-conjugated antibodies to Cdk2, Cdc2, cyclin A, and cyclin B1 (Santa Cruz)  
31 were used to precipitate the Cdks and cyclins from lysates of 500 two-cell embryos, and

32 kinase activity assays were performed as previously described (Rajareddy *et al.*, 2007)  
33 using recombinant histone H1 (Roche) as a substrate. Agarose bead-conjugated  
34 immobilized Akt antibody (Cell Signaling Technologies) was used to precipitate Akt  
35 from lysates of 600 two-cell embryos. The assay was performed as previously described  
36 (Bellacosa *et al.*, 1998) using recombinant histone H2B (New England Biolabs) as a  
37 substrate. [ $\gamma$ -<sup>32</sup>P]ATP (Perkin Elmer) was used to indicate the kinase activity.

38

### 39 **BrdU and BrUTP incorporation assays for embryos**

40 Embryos were cultured with 10  $\mu$ M BrdU (Sigma-Aldrich) from late one-cell stage (30 h  
41 post hCG) to mid two-cell stage (45 h post hCG), and then fixed with 4%  
42 paraformaldehyde at 4°C overnight. The fixed embryos were permeabilized in 0.2%  
43 Triton X-100 for 20 min at RT, and blocked with 2% BSA for 1 h at RT. Then the  
44 embryos were incubated for 1 h at 37°C with mouse monoclonal anti-BrdU antibody  
45 (Dako) and DNase I (Fermentas). The embryos were then incubated with Alexa fluor  
46 488-conjugated anti-mouse secondary antibody (Invitrogen) for 1 h, and 3  $\mu$ M DAPI  
47 (Sigma-Aldrich) for 5 min at RT. The BrdU incorporated was visualized with a Zeiss  
48 Axio Imager Z1 microscope.

49

50 Embryos at mid two-cell stage (45 h post hCG) were prepared for BrUTP incorporation  
51 assay, as described previously (Aoki *et al.*, 1997). Briefly, the plasma membrane of two-  
52 cell embryos was permeabilized for 2 min with 0.05% Triton X-100 in physiological  
53 buffer (PB) containing 100 mM potassium acetate, 30 mM KCl, 1 mM MgCl<sub>2</sub>, 10 mM  
54 Na<sub>2</sub>HPO<sub>4</sub>, 1 mM ATP, 1 mM DTT, 1 $\times$  complete protease inhibitor cocktail (Roche), and  
55 50 U/ml of RNasin (Promega). Treated embryos were then washed three times in PB and  
56 incubated for 10 min at 33°C in PB supplemented with 2 mM MgCl<sub>2</sub>, 2 mM ATP, and  
57 0.4 mM each of GTP, CTP, and BrUTP (Invitrogen). After three washes in PB, the  
58 nuclear membrane was permeabilized in PB containing 0.2% Triton X-100 for 3 min.  
59 The embryos were washed again in PB and fixed overnight with 4% paraformaldehyde.  
60 The BrUTP incorporated was visualized by immunostaining using the same protocol of  
61 BrdU incorporation. The results were quantified with NIH Image J software (National  
62 Institutes of Health). Briefly, nuclear signal was outlined to obtain the mean fluorescence

63 intensity and the cytoplasm background fluorescence was subtracted. The quantified  
64 BrUTP level in *EmPdk1<sup>+/+</sup>* embryos was set as 100%.

65

66 **<sup>35</sup>S-methionine metabolic labeling of embryos and measurement of *de novo* synthesis**  
67 **of TRC**

68 The synthesis of TRC and spindlin was detected by autoradiography as previously  
69 described (Conover *et al.*, 1991). Briefly, one-cell embryos were cultured to late S phase  
70 of the two-cell stage (42 h post hCG) with or without the PI3K inhibitor LY294002 (20  
71  $\mu$ M) (Sigma-Aldrich). Then, 70 two-cell embryos were metabolically labeled with <sup>35</sup>S-  
72 methionine (Perkin Elmer) in M16 medium (Sigma-Aldrich) for 3 h with or without  
73 LY294002. The insoluble proteins were resolved by SDS-PAGE and visualized by  
74 Typhoon 9400 scanner (GE Healthcare).

75

76 **Isolation and culture of oocytes**

77 Growing oocytes (larger than 25  $\mu$ m) were isolated from ovaries of PD15–18 mice as  
78 previously described (Rajareddy *et al.*, 2007). Briefly, to avoid oocytes from primordial  
79 follicles where the *Zp3* promoter is not active, isolated oocytes were filtered with a cell  
80 dispersing screen with 25.4- $\mu$ m opening (Bioworld).

81

82 To study germinal vesicle breakdown (GVBD) and extrusion of the first polar body  
83 (PB1), 23-day-old female mice were treated with 5 IU PMSG and were sacrificed 48 h  
84 later. GV-stage oocytes were collected by puncturing the ovaries in M2 medium  
85 containing 100  $\mu$ M dibutyryl cyclic AMP (dbcAMP) (Sigma-Aldrich). The oocytes were  
86 then washed twice and cultured in dbcAMP-free M16 medium at 37°C for 6 h in an  
87 atmosphere of 5% CO<sub>2</sub> to determine the rate of GVBD. The oocytes that had undergone  
88 GVBD were further cultured for 6 h in M16 medium for evaluation of the extrusion of  
89 PB1.

90

91 **Gonadotropin-induced ovulation and collection of ovulated oocytes**

92 To induce synchronized follicular growth and ovulation in order to obtain ovulated  
93 oocytes for western blot, 23-day-old female mice were injected with 5 IU of PMSG to

94 stimulate follicular development, and with 5 IU hCG 48 h later to induce ovulation.  
95 Ovulation normally takes place 10–12 h after hCG treatment. Cumulus-oocyte complexes  
96 were recovered from oviducts and treated with 0.1% hyaluronidase (Sigma-Aldrich)  
97 before oocytes were collected.

98

### 99 **Histology**

100 Ovaries were fixed in 4% paraformaldehyde, dehydrated, and embedded in paraffin. The  
101 paraffin-embedded ovaries were sectioned at 8  $\mu$ m thickness and stained with  
102 hematoxylin for morphological observation. Images were taken with a Leica DMLB  
103 upright microscope.

104

### 105 **Statistical analysis**

106 All experiments were repeated at least 3 times. For comparisons of embryo numbers and  
107 litter sizes, differences between the two groups were calculated with Student's t-test, and  
108 a difference was considered to be significant at  $P$ -values of  $< 0.05$ .

109 **Supplementary figure legends**

110

111 **Fig S1 Normal follicular development and oocyte maturation in *Pdk1<sup>loxP/loxP</sup>;Zp3-Cre***  
 112 **mice. (A–B)** Western blots showing the absence of PDK1 expression in *Pdk1<sup>loxP/loxP</sup>;Zp3-*  
 113 *Cre* growing (larger than 25  $\mu$ m) and ovulated oocytes.  $\beta$ -actin was the internal control.  
 114 (C) Ovarian histology of 6-week-old control *Pdk1<sup>loxP/loxP</sup>* (panels a and b) and mutant  
 115 *Pdk1<sup>loxP/loxP</sup>;Zp3-Cre* females (panels c and d). Primary follicles (arrowhead), antral  
 116 follicles (arrow), and corpora lutea (CL) are shown, indicating that follicular  
 117 development is not affected by deletion of *Pdk1* in oocytes. (D) Examination of  
 118 maturation of oocytes from *Pdk1<sup>loxP/loxP</sup>;Zp3-Cre* mice. GV-intact oocytes from  
 119 *Pdk1<sup>loxP/loxP</sup>* and *Pdk<sup>loxP/loxP</sup>;Zp3-Cre* females were cultured *in vitro*, and no significant  
 120 difference in the rate of GVBD was found. The rate of extrusion of PB1 was also  
 121 unaltered in *Pdk1<sup>loxP/loxP</sup>;Zp3-Cre* oocytes. Together with our data showing that the  
 122 numbers of two-cell embryos are similar in *Pdk1<sup>loxP/loxP</sup>* and *Pdk1<sup>loxP/loxP</sup>;Zp3-Cre* females  
 123 that have mated with wild-type males (Fig 1B), these results suggest that oocyte  
 124 maturation, ovulation, and fertilization are normal in *Pdk<sup>loxP/loxP</sup>;Zp3-Cre* females.

125 Several previous *in vitro* studies have suggested that PDK1-Akt signaling may regulate  
 126 the maturation and fertilization of oocytes in starfish and mice (Okumura *et al.*,  
 127 2002;Hiraoka *et al.*, 2004;Kalous *et al.*, 2006;Han *et al.*, 2006;Hoshino and Sato, 2008).  
 128 We have, however, shown that ablation of PDK1-Akt signaling in oocytes does not affect  
 129 oocyte maturation, ovulation, or fertilization. In addition, we have shown in an earlier  
 130 study that overactivation of Akt in oocytes (by depletion of PTEN) does not affect oocyte  
 131 maturation, ovulation, and fertilization of female mice (Jagarlamudi *et al.*, 2009). We  
 132 therefore propose that intra-oocyte PI3K/PTEN-PDK1-Akt signaling is unlikely to play  
 133 an essential role in regulation of oocyte maturation, ovulation, and fertilization.

134

135 **Fig S2 Concurrent loss of maternal *Pten* restored the fertility of double-mutant**  
 136 **females. (A)** Numbers of pups per litter from control (*Pdk1<sup>loxP/loxP</sup>*) and double-mutant  
 137 females (*Pdk1<sup>loxP/loxP</sup>;Pten<sup>loxP/loxP</sup>;Zp3-Cre*). Numbers of females (n) used are indicated.  
 138 ns, not statistically significant. (B) Comparison of average cumulative numbers of pups

139 per *Pdk1*<sup>loxP/loxP</sup> female (black line), per *Pdk1*<sup>loxP/loxP</sup>;*Zp3-Cre* female (red line), and per  
140 *Pdk1*<sup>loxP/loxP</sup>;*Pten*<sup>loxP/loxP</sup>;*Zp3-Cre* female (blue line). Numbers of females (n) are indicated.

141

142 **Fig S3 Concurrent loss of maternal *Pten* completely restored TRC synthesis in**

143 **Em*Pdk1*<sup>+/-</sup>;*Pten*<sup>+/-</sup> embryos.** Representative autoradiograph showing the rescued TRC  
144 synthesis in two-cell Em*Pdk1*<sup>+/-</sup>;*Pten*<sup>+/-</sup> embryos. Note that LY294002 (LY) suppressed  
145 the TRC synthesis in both Em*Pdk1*<sup>+/-</sup>;*Pten*<sup>+/-</sup> and control embryos. Spindlin (SPIN) was  
146 used as an internal control.

147 **Supplementary references**

148

149 Aoki F, Worrall DM, and Schultz RM (1997) Regulation of transcriptional activity during  
 150 the first and second cell cycles in the preimplantation mouse embryo. *Dev Biol*, **181**,  
 151 296-307.

152 Bellacosa A, Chan TO, Ahmed NN, Datta K, Malstrom S, Stokoe D, McCormick F, Feng  
 153 J, and Tsichlis P (1998) Akt activation by growth factors is a multiple-step process: the  
 154 role of the PH domain. *Oncogene*, **17**, 313-325.

155 Conover JC, Temeles GL, Zimmermann JW, Burke B, and Schultz RM (1991) Stage-  
 156 specific expression of a family of proteins that are major products of zygotic gene  
 157 activation in the mouse embryo. *Dev Biol*, **144**, 392-404.

158 de Vries WN, Binns LT, Fancher KS, Dean J, Moore R, Kemler R, and Knowles BB  
 159 (2000) Expression of Cre recombinase in mouse oocytes: a means to study maternal  
 160 effect genes. *Genesis*, **26**, 110-112.

161 Han SJ, Vaccari S, Nedachi T, Andersen CB, Kovacina KS, Roth RA, and Conti M (2006)  
 162 Protein kinase B/Akt phosphorylation of PDE3A and its role in mammalian oocyte  
 163 maturation. *EMBO J*, **25**, 5716-5725.

164 Hashimoto N, Kido Y, Uchida T, Asahara S, Shigeyama Y, Matsuda T, Takeda A,  
 165 Tsuchihashi D, Nishizawa A, Ogawa W, Fujimoto Y, Okamura H, Arden KC, Herrera  
 166 PL, Noda T, and Kasuga M (2006) Ablation of PDK1 in pancreatic beta cells induces  
 167 diabetes as a result of loss of beta cell mass. *Nat Genet*, **38**, 589-593.

168 Hiraoka D, Hori-Oshima S, Fukuhara T, Tachibana K, Okumura E, and Kishimoto T  
 169 (2004) PDK1 is required for the hormonal signaling pathway leading to meiotic  
 170 resumption in starfish oocytes. *Dev Biol*, **276**, 330-336.

171 Hoshino Y and Sato E (2008) Protein kinase B (PKB/Akt) is required for the completion  
 172 of meiosis in mouse oocytes. *Dev Biol*, **314**, 215-223.

173 Jagarlamudi K, Liu L, Adhikari D, Reddy P, Idahl A, Ottander U, Lundin E, and Liu K  
 174 (2009) Oocyte-specific deletion of Pten in mice reveals a stage-specific function of  
 175 PTEN/PI3K signaling in oocytes in controlling follicular activation. *PLoS ONE*, **4**,  
 176 e6186.

177 Kalous J, Solc P, Baran V, Kubelka M, Schultz RM, and Motlik J (2006) PKB/AKT is  
 178 involved in resumption of meiosis in mouse oocytes. *Biol Cell*, **98**, 111-123.

179 Okumura E, Fukuhara T, Yoshida H, Hanada SS, Kozutsumi R, Mori M, Tachibana K,  
 180 and Kishimoto T (2002) Akt inhibits Myt1 in the signalling pathway that leads to  
 181 meiotic G2/M-phase transition. *Nat Cell Biol*, **4**, 111-116.

182 Rajareddy S, Reddy P, Du C, Liu L, Jagarlamudi K, Tang W, Shen Y, Berthet C, Peng  
183 SL, Kaldis P, and Liu K (2007) p27kip1 (cyclin-dependent kinase inhibitor 1B)  
184 controls ovarian development by suppressing follicle endowment and activation and  
185 promoting follicle atresia in mice. *Mol Endocrinol*, **21**, 2189-2202.

186 Reddy P, Liu L, Adhikari D, Jagarlamudi K, Rajareddy S, Shen Y, Du C, Tang W,  
187 Hamalainen T, Peng SL, Lan ZJ, Cooney AJ, Huhtaniemi I, and Liu K (2008) Oocyte-  
188 specific deletion of Pten causes premature activation of the primordial follicle pool.  
189 *Science*, **319**, 611-613.



Supplementary figure

Figure S1

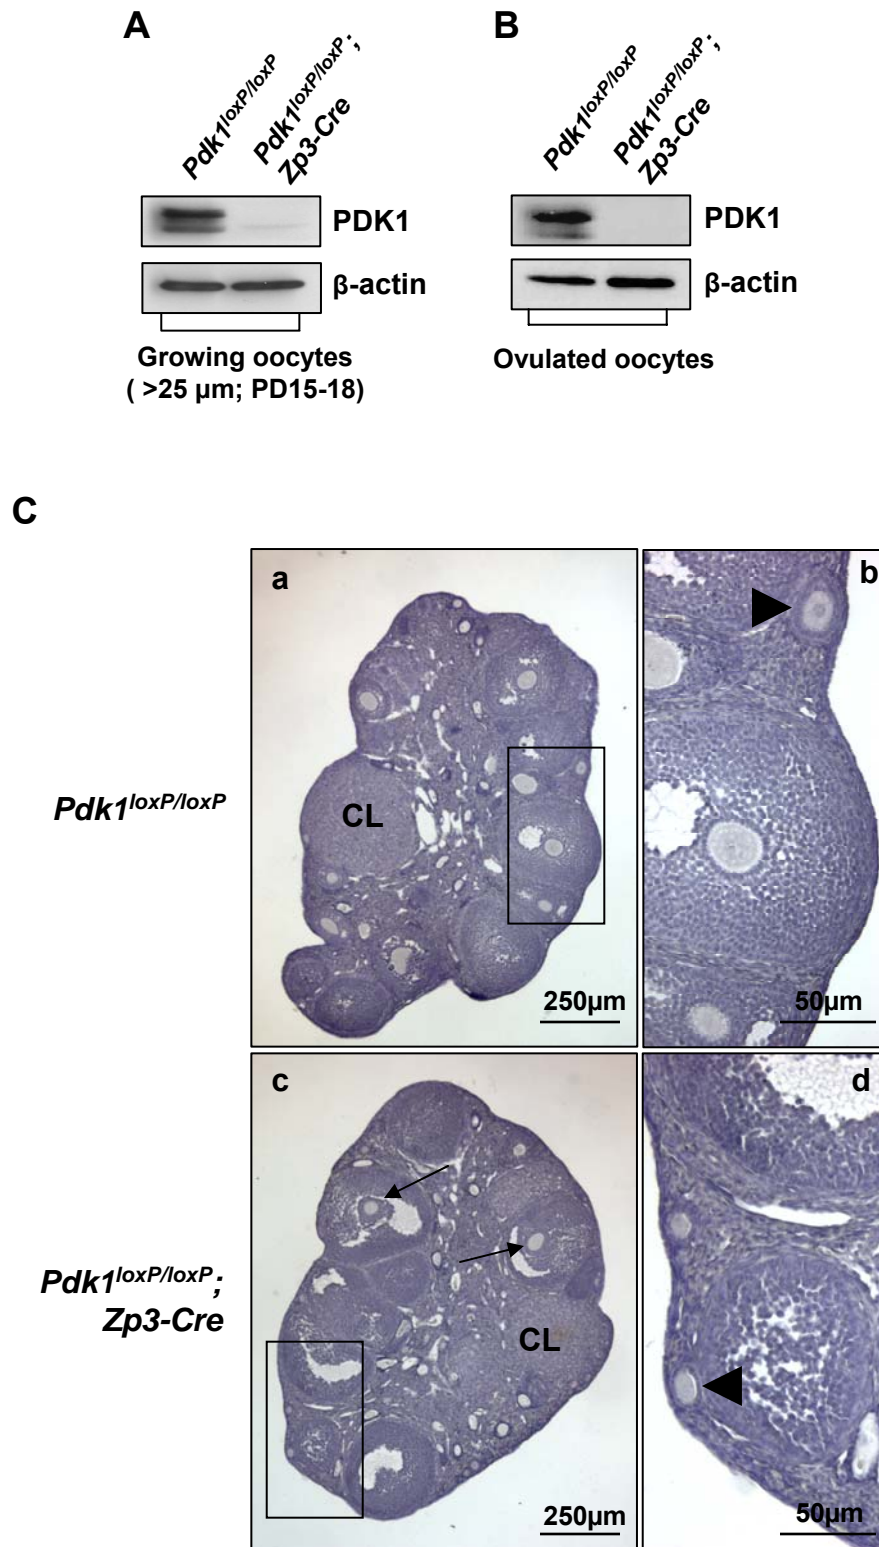

Figure S1 continued

D

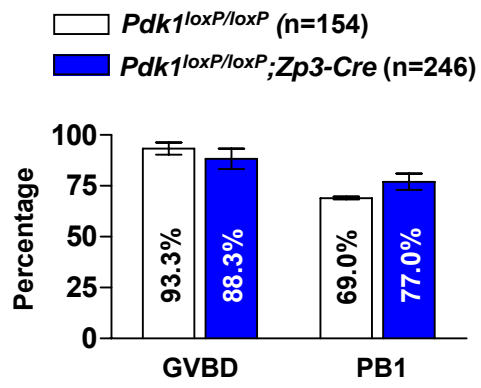

Figure S2

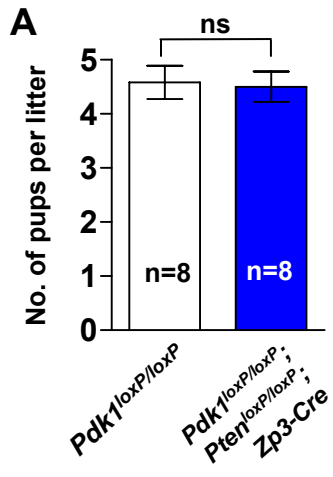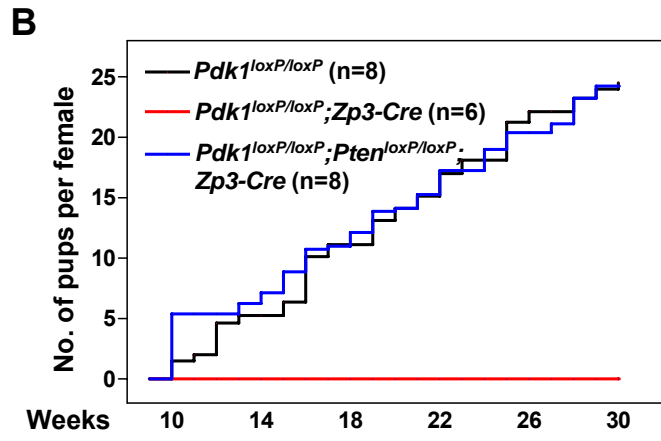

Figure S3

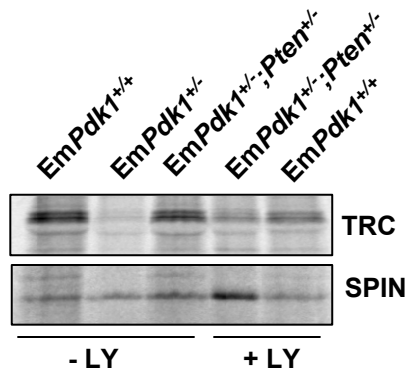

Supplement: embor2010144-s1.pdf [file embor2010144-s1.pdf]
